# Supplementary material for: Soluble Receptor Isoform of IFN-Beta (sIFNAR2) in Multiple Sclerosis Patients and Their Association With the Clinical Response to IFN-Beta Treatment
Source: PubMed Central journal article supplement (PMC8716373; doi:10.3389/fimmu.2021.778204), 2021-12-16

Supplementary Figure 1. sIFNAR2 primer sequence design.

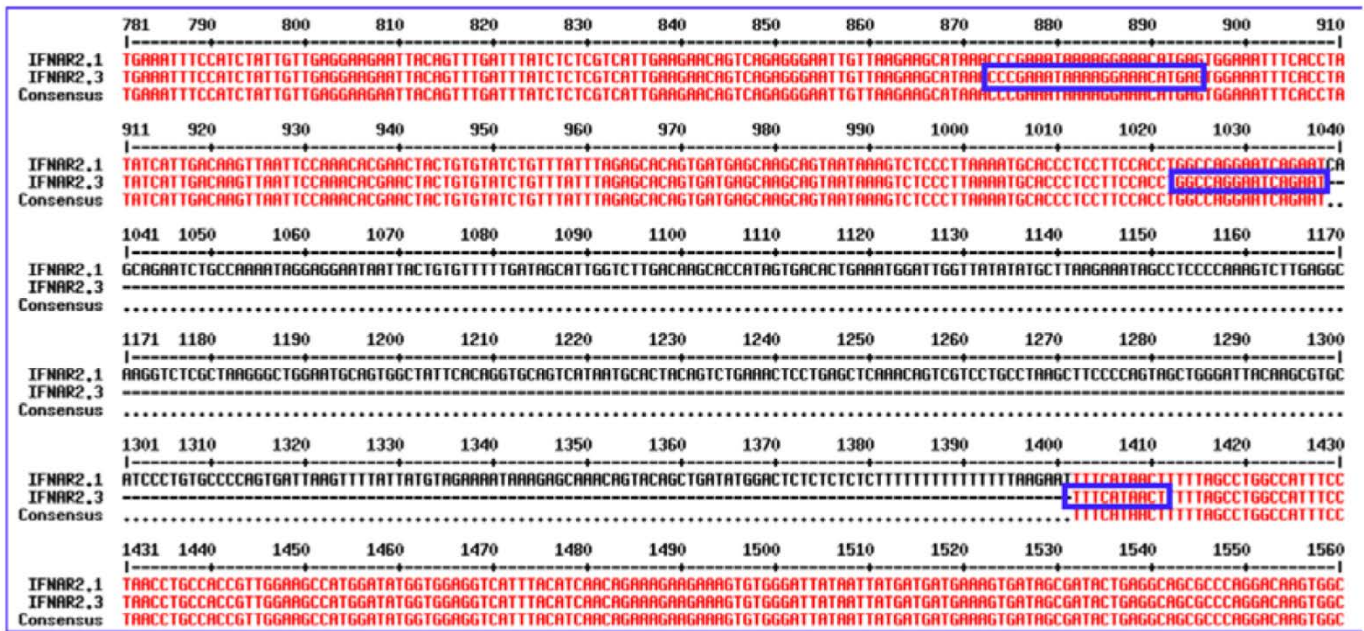

Supplementary Table 1. Primer information and/or sequence.

| Gene name | DNA sequence / Catalog number                                                      |
|-----------|------------------------------------------------------------------------------------|
| IFNAR1    | Cat. no: PPH00869F-200 QIAGEN                                                      |
| IFNAR2    | Cat. no: PPH00870B-200 QIAGEN                                                      |
| MxA       | Cat. no: PPH01325A-200 QIAGEN                                                      |
| PSEN1     | Cat. no: QT00001862 QIAGEN                                                         |
| PSEN2     | Cat. No: QT00196854 QIAGEN                                                         |
| GAPDH     | Cat. no: PPH00150F-200 QIAGEN                                                      |
| sIFNAR2   | Sense: 5' CCCGAAATAAAAGGAAACATGA 3'<br>Antisense: 5' GGCCAGGAATCAGAATTTTCATAACT 3' |
| ADAM17    | Sense: 5' CCCCGATGTGAGCAGTTT 3'<br>Antisense: 5' AATCAAGCTTCTCGAGTCTCT 3'          |

Supplementary Figure 2.  $\Delta$ sIFNAR2 for each patient after 6 or 12 months of IFN- $\beta$  treatment onset in (A) Cohort 1 and (B) Cohort 2.

(A)

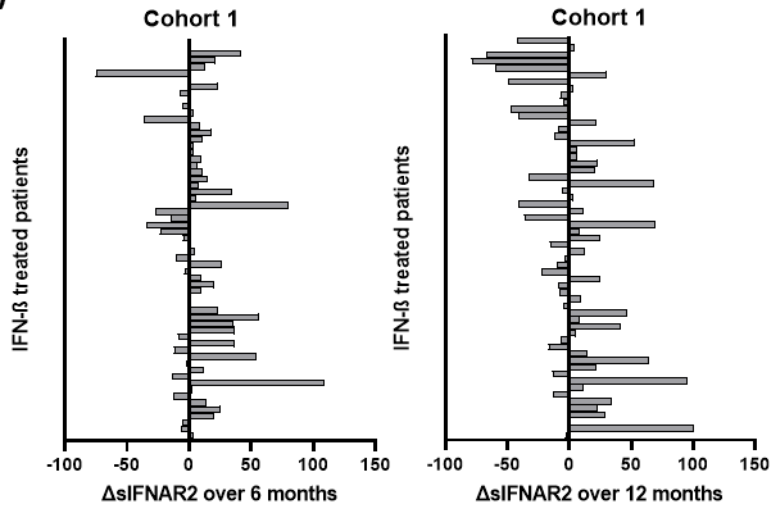

(B)

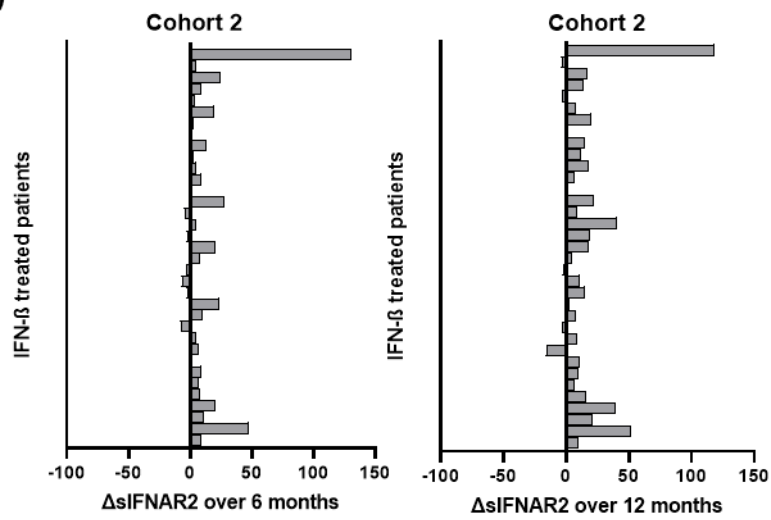

Supplement: DataSheet_1.pdf [file DataSheet_1.pdf]
